# Supplementary material for: Core–shell 2D nanoarchitectures: engineering N, P-doped graphitic carbon/MXene heterostructures for superior capacitive deionization
Source: Royal Society of Chemistry journal article supplement (doi:10.1039/d3ta00696d), 2023-01-01
Supplement: d3ta00696d1.pdf [file d3ta00696d1.pdf]

## S1. Experimental Section

### S1.1. Chemicals

Methanol ( $\geq 99.5\%$ ), ethanol ( $\geq 99.7\%$ ), isopropyl alcohol ( $\geq 99.5\%$ ), N-methyl-2-pyrrolidone (NMP, 99.9%), and phytic acid solution (PA, 70% in  $\text{H}_2\text{O}$ ) were obtained from Makclm Chemistry (Shanghai, China). Cobalt acetate tetrahydrate ( $\text{Co}(\text{OAc})_2 \cdot 4\text{H}_2\text{O}$ , 99%), and 2-methylimidazole (HMeIm, 98%) were purchased from Aladdin Chemistry (Shanghai, China). Polyvinylidene fluoride (PVDF 6020), and carbon black (Super P) were provided by Sigma-Aldrich (St. Louis, MO, USA). All chemicals were directly used without further purification.

### S1.2. Synthesis of ZIF-67/MXene

First,  $\text{Ti}_3\text{C}_2\text{T}_x$  MXene was prepared using the LiF/HCl solution to selectively remove the Al interlayers of  $\text{Ti}_3\text{AlC}_2$  MAX phase, followed by the organic solvent intercalation-assisted sonication in  $\text{N}_2$ -saturated deionized water to avoid the MXene oxidation [S1]. In a typical synthesis of the ZIF-67/MXene precursors, 20 mmol (1.642 g) of HMeIm, and 2 mmol (0.4982 g) of  $\text{Co}(\text{OAc})_2 \cdot 4\text{H}_2\text{O}$  were dissolved into ultrapure water (20 mL and 12 mL), respectively. The  $\text{Co}^{2+}$  solution was added into 24 mL of  $\text{Ti}_3\text{C}_2\text{T}_x$  MXene aqueous solution ( $1 \text{ mg L}^{-1}$ ) to obtain a homogeneous mixture solution by stirring for 30 min. The HMeIm solution was subsequently added to the above  $\text{Co}^{2+}$ /MXene mixture solution. After stirring for 4 h, the purple product of ZIF-67/MXene was harvested by centrifugation and washed with water several times.

### S1.3. Synthesis of N-GC/MXene

The as-synthesized ZIF-67/MXene precursors were transferred into a tube furnace and pyrolyzed at 800 °C for 3 h under  $\text{N}_2$  atmosphere, with a heating rate of  $2 \text{ °C min}^{-1}$  to obtain the N-GC/MXene. Subsequently, the N-GC/MXene was immersed into  $0.5 \text{ mol L}^{-1}$   $\text{H}_2\text{SO}_4$  solution at 80 °C for 6 h to

eliminate the deposited Co and CoO. The product was washed with water several times until the supernatant became neutral and then dried under vacuum at 70 °C overnight.

#### ***S1.4. Synthesis of N, P-GC/MXene***

In a typical phosphorization of N-GC/MXene with PA, 15 mg of N-GC/MXene was dispersed into the solvent of ethanol (0.7 mL) containing 56.7  $\mu$ L of PA solution [S2]. After sonicating for 15 min and drying, the resulting mixture was then transferred into a tube furnace and heated at 1000 °C for 2 h under N<sub>2</sub> atmosphere. Finally, the N, P-GC/MXene was obtained after cooling down to room temperature.

#### ***S1.5. Characterizations***

The morphologies and microstructures of the as-synthesized samples were observed by field emission scanning electron microscopy (SEM, Hitachi SU-8000, Tokyo, Japan) with an accelerating voltage of 10.0 kV. Transmission electron microscopy (TEM), high-resolution TEM, energy-dispersive X-ray spectroscopy (EDXS), and elemental mapping analysis were performed using a JEM-2100F instrument (JEOL, Tokyo, Japan) operating at 200 kV. X-ray photoelectron spectroscopy (XPS) data were collected with a PHI Quantera SXM (ULVAC-PHI) instrument using Al  $K\alpha$  radiation. X-ray diffraction (XRD) patterns were recorded using a Rigaku Rint 2000 X-ray diffractometer with monochromatic Cu  $K\alpha$  radiation (40 kV, 40 mA) at a scanning rate of 2 °C min<sup>-1</sup>. N<sub>2</sub> adsorption-desorption isotherms were obtained using a Belsorp-max instrument (BEL, Japan). Fourier-transformed infrared spectra (FT-IR) were obtained using Bruker Alpha spectrometer (Ettlingen, Germany). Raman spectra were obtained by a DXR2xi Micro-Raman Spectrometer (Thermo Fisher, USA). The conductivities of the NaCl solutions were continuously measured by a REX DDSJ-308F conductivity meter (INESA Scientific Instrument, Shanghai, China).

### ***S1.6. Electrochemical measurements***

The electrochemical properties of the corresponding electrodes were evaluated by cyclic voltammetry (CV), galvanostatic charge/discharge (GCD), and electrochemical impedance spectroscopy (EIS) using a CHI 760E electrochemical workstation (Chenhua, Shanghai, China). All electrochemical measurements with a standard three-electrode cell were performed at room temperature (25 °C) in 1.0 mol L<sup>-1</sup> NaCl solution, which is composed of a platinum counter electrode and a KCl-saturated Ag/AgCl reference electrode. To prepare the working electrodes (mass loading: 2 mg cm<sup>-2</sup>), a homogeneous slurry of the as-synthesized materials, PVDF, and carbon black at a mass ratio of 8: 1: 1 in NMP solvent was coated onto the graphite paper (0.5 cm<sup>2</sup>) and dried under vacuum overnight.

The specific capacitances ( $C$ , F g<sup>-1</sup>) were calculated by the following equation (1) from the GCD curves [S3]:

$$C = \frac{I \times \Delta t}{m \times V} \quad (1)$$

where  $I$  is the current (A),  $\Delta t$  is the discharge time (s),  $m$  is the mass of the sample (g), and  $V$  is the voltage window (V).

The areal capacitances ( $C_A$ , mF cm<sup>-2</sup>) were calculated by the following equation (2) from the GCD curves [S4]:

$$C_A = \frac{I \times \Delta t}{A \times V} \quad (2)$$

where  $I$  is the current (A),  $\Delta t$  is the discharge time (s),  $A$  is the area of graphite paper (cm<sup>2</sup>), and  $V$  is the voltage window (V).

The relationship between the measured current density ( $i$ ) and scan rate ( $\nu$ ) follows the equations (3) and (4) [S5, S6]:

$$i = av^b \quad (3)$$

$$\log(i) = b \log(v) + \log(a) \quad (4)$$

where  $a$  and  $b$  are modulatory parameters obtained from the fitted curves. Generally, the value of  $b$  approaching 0.5 suggests a diffusion-controlled process, while the value of  $b$  close to 1.0 indicates a surface-controlled process [S5]. Moreover, the contribution from diffusion-controlled process can be quantified by using equations (5) and (6) [S6, S7]:

$$i(V) = k_1v + k_2v^{1/2} \quad (5)$$

$$i(V)/v^{1/2} = k_1v^{1/2} + k_2 \quad (6)$$

where  $k_1v$  and  $k_2v^{1/2}$  represent the diffusion-controlled and diffusion-controlled contribution [S8, S9], respectively.

### ***S1.7. Desalination performance measurements***

The CDI measurements were carried out in a continuous cycle system including a peristaltic pump, constant current power supply, stirring device, a tank, and a pair of ion exchange membranes. An asymmetric CDI cell was assembled to evaluate desalination performance with the as-synthesized electrodes, *e.g.*, N, P-GC/MXene, and activated carbon (AC) acting as the cathode and anode, respectively. The CDI electrodes were fabricated by a slurry mixing in NMP solution of the electrode materials: carbon black: PVDF=8: 1: 1. The slurry was coated on the graphite paper (3.5 ×3.5 cm<sup>2</sup>) and dried overnight at 80 °C in a vacuum. In the CDI experiment, the ion conductivity meter monitored and measured the real-time saline concentration variation under different concentrations and voltages. The volume of the NaCl solution was 32 mL, and the flow rate was 30 mL min<sup>-1</sup>. The salt adsorption capacity (SAC, mg g<sup>-1</sup>) [S3], areal salt adsorption capacity (ASAC, mg m<sup>-2</sup>) [S10], and mean salt adsorption rate (MSAR, mg g<sup>-1</sup> min<sup>-1</sup>) at  $t$  min [S3] were calculated as the following

equations (7), (8) and (9):

$$\text{SAC} = \frac{(C_0 - C_t) \times V_s}{m} \quad (7)$$

$$\text{ASAC} = \frac{(C_0 - C_t) \times V_s}{A} \quad (8)$$

$$\text{MSAR} = \frac{\text{SAC}}{t} \quad (9)$$

where  $C_0$  and  $C_t$  are the NaCl concentrations at the initial stage and  $t$  min ( $\text{mg L}^{-1}$ ), respectively;  $V_s$  is the solution volume (L);  $m$  is the total mass (g) of the electrode materials on the working electrodes;  $A$  is the area of the graphite paper ( $\text{m}^2$ ).

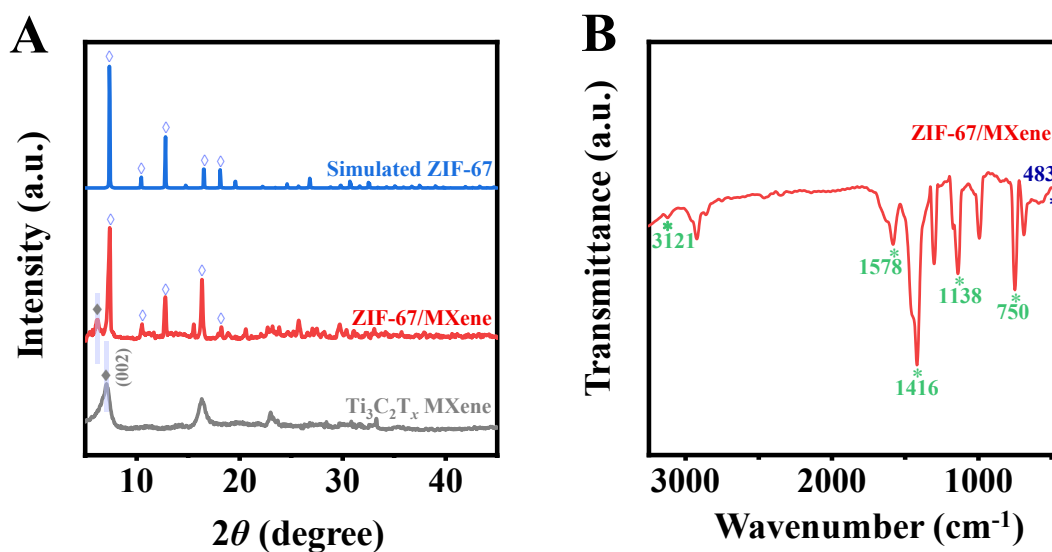

**Fig. S1.** (A) XRD patterns of pure MXene, ZIF-67/MXene, and simulated ZIF-67. (B) FT-IR spectra of pure MXene and ZIF-67/MXene.

**Note for Fig. S1.** FT-IR spectrum of the ZIF-67/MXene possesses not only the conspicuous feature of Ti-C at  $483\text{ cm}^{-1}$  [S11] from the  $Ti_3C_2T_x$  MXene, but also the characteristic peaks of ZIF-67, such as the band at  $3121\text{ cm}^{-1}$  corresponded to C-H vibrations from the aromatic rings of HMeIm,  $1578\text{ cm}^{-1}$  for C=N in HMeIm, and those at  $1416\text{ cm}^{-1}$ ,  $1138\text{ cm}^{-1}$ , and  $750\text{ cm}^{-1}$  for the imidazole rings of HMeIm [S12, S13].

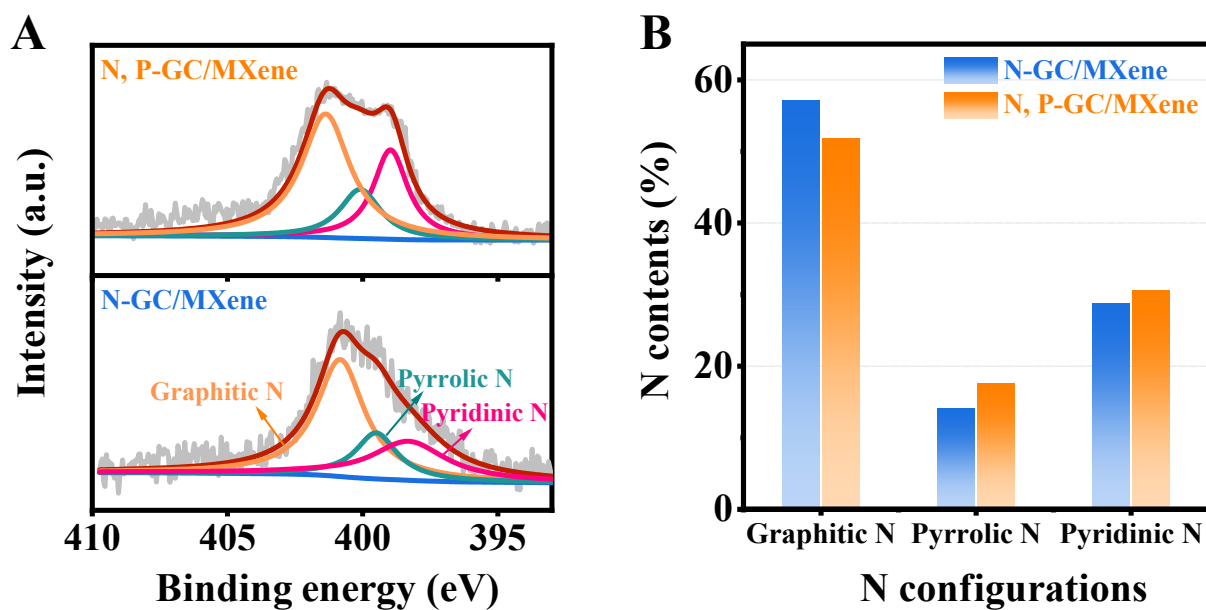

**Fig. S2.** (A) High-resolution XPS spectra of N 1s and (B) N contents of N-GC/MXene and N, P-GC/MXene.

**Note for Fig. S2.** The high-resolution N 1s spectra display three fitted peaks at 400.8, 399.5, and 398.3 eV, which correspond to graphitic N, pyrrolic N, and pyridinic N [S14, S15], respectively.

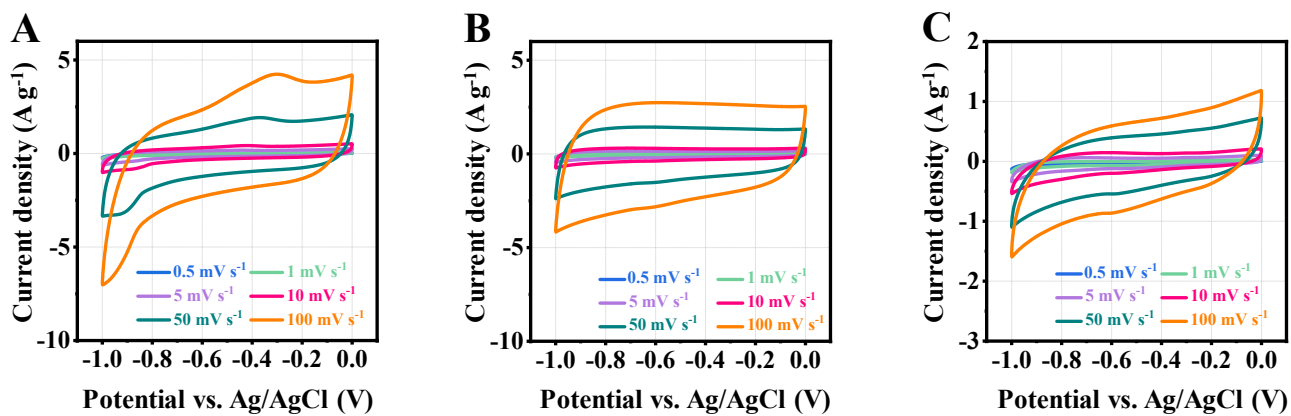

**Fig. S3.** CV curves at the scan rate from 0.5 to 100  $\text{mV s}^{-1}$  of (A) N, P-GC/MXene, (B) N-GC/MXene, and (C) pure MXene.



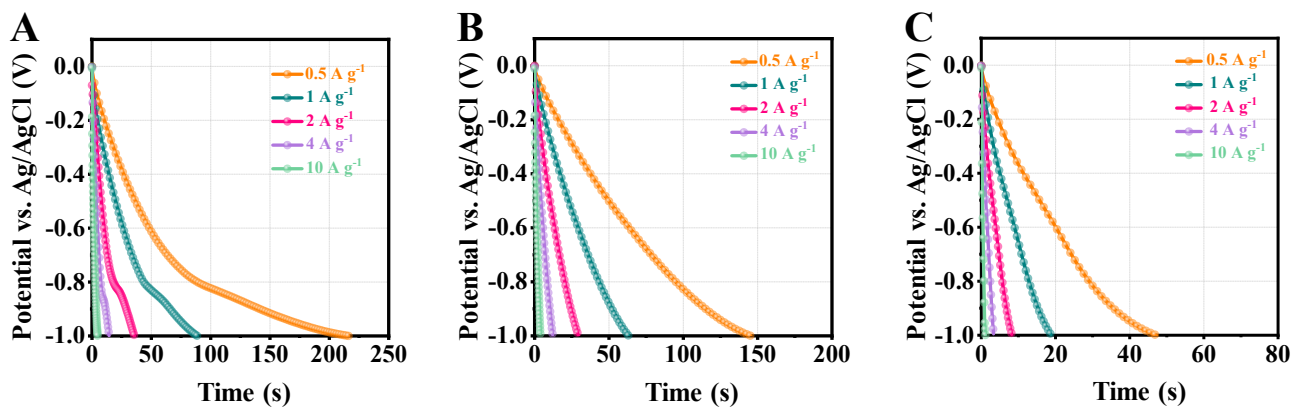

**Fig. S4.** GCD curves at the current densities ranging from 0.5 to 10 A g<sup>-1</sup> of (A) N, P-GC/MXene, (B) N-GC/MXene, and (C) pure MXene.

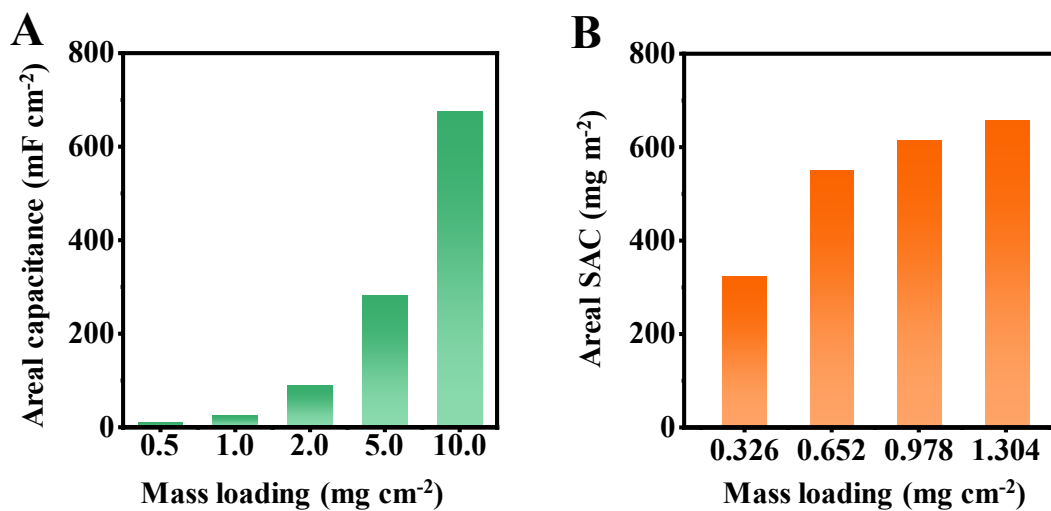

**Fig. S5.** (A) Areal capacitance and (B) Areal salt adsorption capacity of the N, P-GC/MXene electrodes under different mass loading.

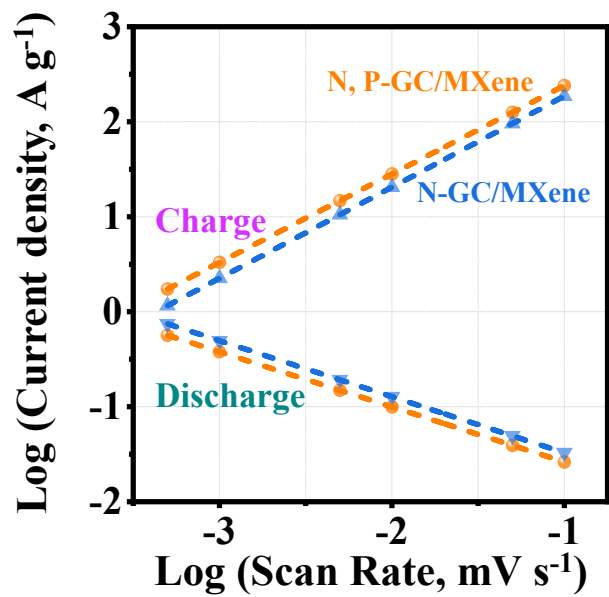

**Fig. S6.** Fitted curves of current density and the scan rate in charge and discharge processes of N, P-GC/MXene, and N-GC/MXene.

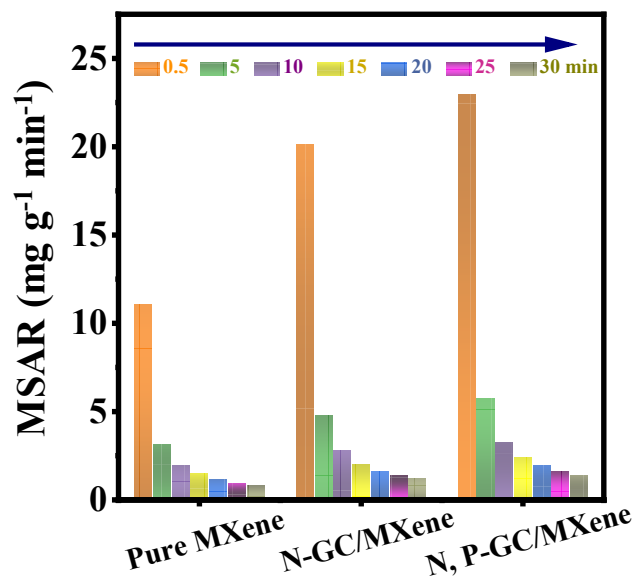

**Fig. S7.** Mean salt adsorption rate values at different deionization times for pure MXene, N-GC/MXene, and N, P-GC/MXene.

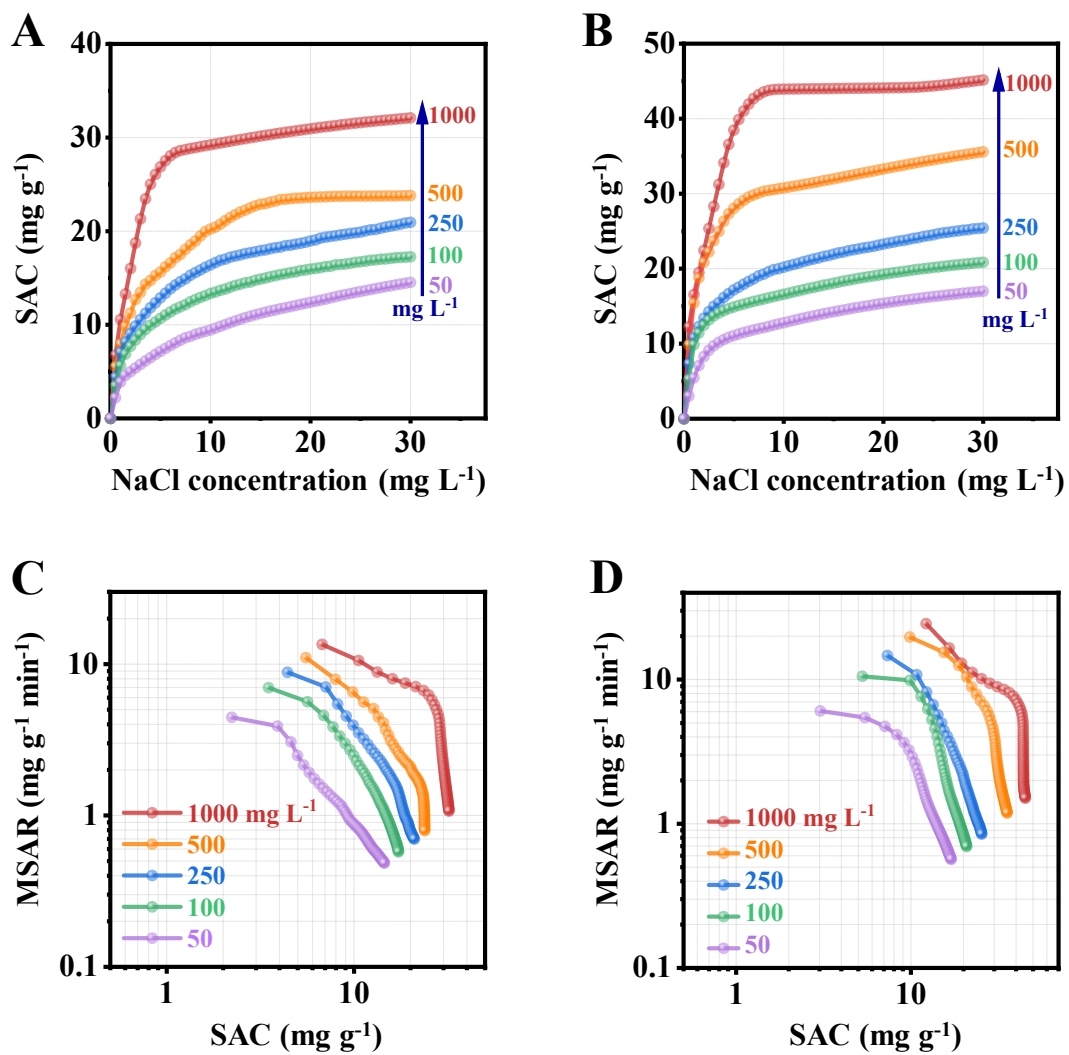

**Fig. S8.** Dynamic SAC versus running time plots of (A) pure MXene and (B) N-GC/MXene, and the corresponding CDI Ragone plots of (C) pure MXene and (D) N-GC/MXene with the NaCl concentrations ranging from 50 to 1000 mg L<sup>-1</sup>.

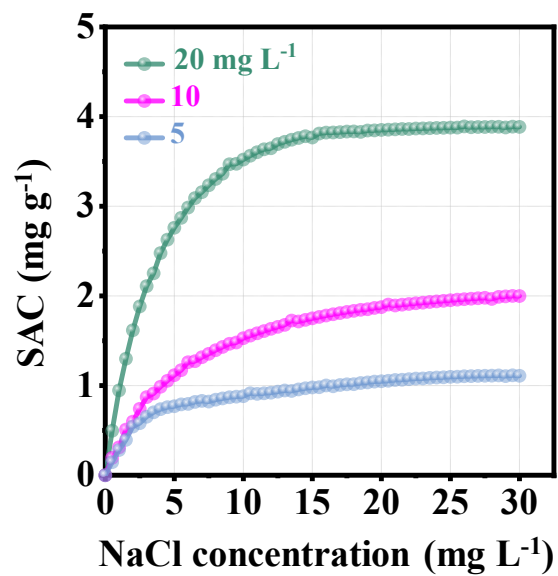

**Fig. S9.** Dynamic SAC versus running time plots of the N, P-GC/MXene based CDI cell at the NaCl concentrations of 5, 10, and 20 mg L<sup>-1</sup> (Applied voltage, 1.4 V).

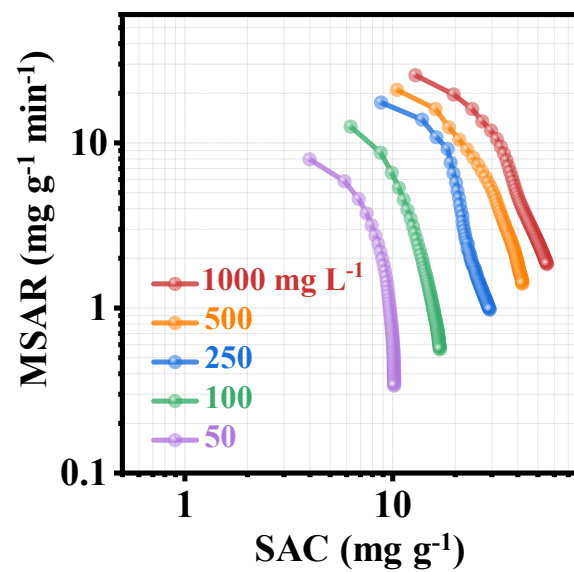

**Fig. S10.** CDI Ragone plots of N, P-GC/MXene with the NaCl concentrations ranging from 50 to 1000  $\text{mg L}^{-1}$ .

**Table S1.** CDI performance comparisons between N, P-GC/MXene with other MXene-based electrode materials.

| Electrodes                                                            | Voltage (V) | NaCl concentration (mg L <sup>-1</sup> ) | SAC (mg g <sup>-1</sup> ) | Refs       |
|-----------------------------------------------------------------------|-------------|------------------------------------------|---------------------------|------------|
| MXene/PVA                                                             | 1.0         | 1000                                     | 51.1                      | [S16]      |
| Pure MXene                                                            | 1.2         | 292.5                                    | 13                        | [S17]      |
| L-Ti <sub>3</sub> C <sub>2</sub> T <sub>x</sub> MXene                 | 1.2         | 877.5                                    | 30.08                     | [S18]      |
| Porous Ti <sub>3</sub> C <sub>2</sub> T <sub>x</sub>                  | 1.2         | 5000                                     | 42.3                      | [S19]      |
| MXene-NaOH                                                            | 1.2         | 500                                      | 16.05                     | [S20]      |
| MXene/CNT                                                             | 1.2         | 1168.8                                   | 12                        | [S21]      |
| MoS <sub>2</sub> /MXene                                               | 1.2         | 500                                      | 23.98                     | [S22]      |
| Fe <sub>3</sub> O <sub>4</sub> @Ti <sub>3</sub> C <sub>2</sub>        | 1.2         | 500                                      | 44                        | [S23]      |
| N-Ti <sub>3</sub> C <sub>2</sub> T <sub>x</sub>                       | 1.2         | 5000                                     | 43.5                      | [S24]      |
| W <sub>18</sub> O <sub>49</sub> /Ti <sub>3</sub> C <sub>2</sub> MXene | 1.2         | 500                                      | 29.25                     | [S25]      |
| CLF@Ti <sub>3</sub> C <sub>2</sub> T <sub>x</sub>                     | 1.2         | 600                                      | 34.0                      | [S26]      |
| Preconditioned Ti <sub>3</sub> C <sub>2</sub> T <sub>x</sub>          | 1.2         | 585                                      | 9.19                      | [S27]      |
| Alk-Ti <sub>3</sub> C <sub>2</sub> T <sub>x</sub>                     | 1.2         | 1000                                     | 50                        | [S28]      |
| Ar plasma/MXene                                                       | 1.4         | 500                                      | 26.8                      | [S29]      |
| mPDA/MXene                                                            | 1.5         | 1000                                     | 36.53                     | [S30]      |
| NH <sub>4</sub> HF <sub>2</sub> -etched MXene                         | 1.6         | 498                                      | 12.1                      | [S31]      |
| N-doped MXene                                                         | 1.6         | 5000                                     | 53                        | [S32]      |
| MXene@COF                                                             | 1.6         | 1000                                     | 53.1                      | [S3]       |
| MXene-derived N-TNF                                                   | 1.8         | 500                                      | 44.8                      | [S33]      |
| NaTi <sub>2</sub> (PO <sub>4</sub> ) <sub>3</sub> /MXene              | 1.8         | 250                                      | 32.3                      | [S34]      |
| N, P-GC/MXene                                                         | 1.4         | 1000                                     | 55.3                      | This study |



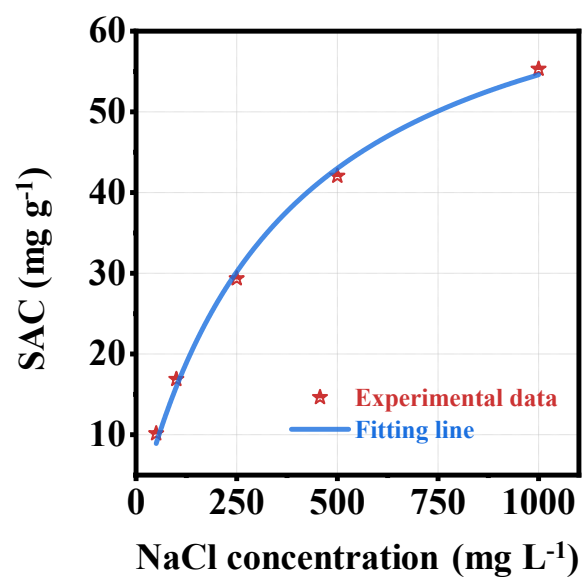

**Fig. S11.** Langmuir isotherm and SAC experimental data of the N, P-GC/MXene in NaCl solution at concentrations ranging from 50 to 1000 mg L<sup>-1</sup>.

**Table S2.** Coefficients of Langmuir fitting.

| Isotherm | Model equation [S13]              | Parameters | Values  |
|----------|-----------------------------------|------------|---------|
| Langmuir | $q = \frac{q_m K_L C}{1 + K_L C}$ | $q_m$      | 74.8    |
|          |                                   | $K_L$      | 0.00271 |
|          |                                   | $r^2$      | 0.990   |

## References

- [S1] M. R. Lukatskaya, S. Kota, Z. Lin, M. Q. Zhao, N. Shpigel, M. D. Levi, J. Halim, P.-L. M. W. Taberna, Barsoum, P. Simon and Y. Gogotsi, *Nat. Energy*, 2017, 2, 17105.
- [S2] J. Guo, X. Xu, J.P. Hill, L. Wang, J. Dang, Y. Kang, Y. Li, W. Guan and Y. Yamauchi, *Chem. Sci.*, 2021, 12, 10334-10340.
- [S3] S. Zhang, X. Xu, X. Liu, Q. Yang, N. Shang, X. Zhao, C. Wang, Z. Wang, J.G. Shapte and Y. Yamauchi, *Mater. Horiz.*, 2022, 9, 1708-1716.
- [S4] C. Fang and D. Zhang, *J. Mater. Chem. A*, 2020, 8, 12586-12593.
- [S5] T. Wu, M. Jing, L. Yang, G. Zou, H. Hou, Y. Zhang, Y. Zhang, X. Cao and X. Ji, *Adv. Energy Mater.*, 2019, 9, 1803478.
- [S6] H. Zhang, C. Wang, W. Zhang, M. Zhang, J. Qi, J. Qian, , X. Sun, B. Yulianto, J. Na, T. Park, H. G. A. Goma, Y. V. Kaneti, J. W. Ji, Y. Yamauchi and J. Li, *J. Mater. Chem. A*, 2021, 9, 12807.
- [S7] T. Liu, Z. Zhou, Y. Guo, D. Guo and G. Liu, *Nat. Commun.*, 2019, 10, 675.
- [S8] W. Song, H. Zhao, J. Ye, M. Kang, S. Miao and Z. Li, *ACS Appl. Mater. Interfaces*, 2019, 11, 17416-17424.
- [S9] X. Liu, S. Zhang, G. Feng, Z.-G. Wu, D. Wang, M. D. Albaqami, B. Zhong, Y. Chen, X. Guo, X. Xu and Y. Yamauchi, *Chem. Mater.*, 2021, 33, 1657-1666.
- [S10] Q. Liu, X. Li, G. Tan and D. Xiao, *Desalination*, 2022, 538, 115890.
- [S11] Z. Wang, J. Xuan, Z. Zhao, Q. Li and F. Geng, *ACS Nano*, 2017, 11, 11559-11565.
- [S12] S. Rafiei, S. Tangestaninejad, P. Horcajada, M. Moghadam, V. Mirkhani, I. Mohammadpoor-Baltork, R. Kardanpour and F. Zadehahmadi, *Chem. Eng. J.*, 2018, 334, 1233-1241.
- [S13] C. Liu, Y. Bai, W. Li, F. Yang, G. Zhang and H. Pang, *Angew. Chem. Int. Ed.*, 2022, 61, e202116282.
- [S14] Y. Zhang, J. Wu, S. Zhang, N. Shang, X. Zhao, S.M. Alshehri, T. Ahamad, Y. Yamauchi, X. Xu and Y. Bando, *Nano Energy*, 2022, 97, 107146.
- [S15] S. Zhang, W. Xia, Q. Yang, Y. Valentino Kaneti, X. Xu, S.M. Alshehri, T. Ahamad, M.S.A. Hossain, J. Na, J. Tang and Y. Yamauchi, *Chem. Eng. J.*, 2020, 396, 125154.
- [S16] J. Ai, J. Li, K. Li, F. Yu and J. Ma, *Chem. Eng. J.*, 2021, 408, 127256.
- [S17] P. Srimuk, F. Kaasik, B. Krüner, A. Tolosa, S. Fleischmann, N. Jäckel, M.C. Tekeli, M. Aslan, M.E. Suss and V. Presser, *J. Mater. Chem. A*, 2016, 4, 18265-18271.
- [S18] S. Buczek, M.L. Barsoum, S. Uzun, N. Kurra, R. Andris, E. Pomerantseva, K.A. Mahmoud and Y. Gogotsi, *Energy Environ. Sci.*, 2020, 3, 398-404.
- [S19] W. Bao, X. Tang, X. Guo, S. Choi, C. Wang, Y. Gogotsi and G. Wang, *Joule*, 2018, 2, 778-787.
- [S20] B. Chen, A. Feng, R. Deng, K. Liu, Y. Yu and L. Song, *ACS Appl. Mater. Interfaces*, 2020, 12, 13750-13758.
- [S21] M. Torkamanzadeh, L. Wang, Y. Zhang, Ö. Budak, P. Srimuk and V. Presser, *ACS Appl. Mater. Interfaces*, 2020, 12, 26013-26025.
- [S22] Z. Chen, X. Xu, Y. Liu, J. Li, K. Wang, Z. Ding, F. Meng, T. Lu and L. Pan, *Desalination*, 2022, 528, 115616.
- [S23] K. Wang, L. Chen, G. Zhu, X. Xu, L. Wan, T. Lu and L. Pan, *Desalination*, 2022, 522, 115420.
- [S24] A. Amiri, Y. Chen, C. Bee Teng and M. Naraghi, *Energy Stor. Mater.*, 2020, 25, 731-739.
- [S25] J. Liang, J. Yu, W. Xing, W. Tang, N. Tang and J. Guo, *Chem. Eng. J.*, 2022, 435, 134922.
- [S26] S. Anwer, D.H. Anjum, S. Luo, Y. Abbas, B. Li, S. Iqbal and K. Liao, *Chem. Eng. J.*, 2021, 406, 126827.

- [S27] L. Agartan, K. Hantanasirisakul, S. Buczek, B. Akuzum, K.A. Mahmoud, B. Anasori, Y. Gogotsi and E.C. Kumbur, *Desalination*, 2020, 477, 114267.
- [S28] X. Shen, R. Hai, X. Wang, Y. Li, Y. Wang, F. Yu and J. Ma, *J. Mater. Chem. A*, 2020, 8, 19309-19318.
- [S29] L. Guo, X. Wang, Z.Y. Leong, R. Mo, L. Sun and H.Y. Yang, *FlatChem*, 2018, 8, 17-24.
- [S30] Q. Li, X. Xu, J. Guo, J.P. Hill, H. Xu, L. Xiang, C. Li, Y. Yamauchi and Y. Mai, *Angew. Chem. Int. Ed.*, 2021, 60, 26528-26534.
- [S31] A. Feng, Y. Yu, L. Mi, Y. Yu and L. Song, *Ionics*, 2019, 25, 727-735.
- [S32] G. Zhang, L. Wang, R. Sa, C. Xu, Z. Li and L. Wang, *Environ. Sci. Nano*, 2022, 9, 204-213.
- [S33] Z. Ding, X. Xu, J. Li, Y. Li, K. Wang, T. Lu, M.S.A. Hossain, M.A. Amin, S. Zhang, L. Pan and Y. Yamauchi, *Chem. Eng. J.*, 2022, 430, 133161.
- [S34] Z. Chen, X. Xu, Z. Ding, K. Wang, X. Sun, T. Lu, M. Konarova, M. Eguchi, J.G. Shapter, L. Pan and Y. Yamauchi, *Chem. Eng. J.*, 2021, 407, 127148.
